# Supplementary material for: Penetration depth tunable BODIPY derivatives for pH triggered enhanced photothermal/photodynamic synergistic therapy
Source: PubMed Central journal article supplement — Chem Sci. 2018 Oct 15;10(1):268–76. doi: 10.1039/c8sc02443j (PMC6333239; doi:10.1039/c8sc02443j), 2018-10-15
Supplement: SC-010-C8SC02443J-s001.pdf [file SC-010-C8SC02443J-s001.pdf]

# **Penetration depth tunable BODIPY derivatives for tumor acidity activating enhanced photothermal/photodynamic synergistic therapy**

Jianhua Zou<sup>a</sup>, Peng Wang<sup>a</sup>, Ya Wang<sup>a</sup>, Gongyuan Liu<sup>a</sup>, Yewei Zhang<sup>d</sup>, Qi Zhang<sup>c</sup>, Jinjun Shao<sup>a</sup>, Weili Si<sup>a\*</sup>, Wei Huang<sup>b</sup>, Xiaochen Dong<sup>a\*</sup>

<sup>a</sup>Key Laboratory of Flexible Electronics (KLOFE) & Institute of Advanced Materials (IAM), Nanjing Tech University (NanjingTech), 30 South Puzhu Road, Nanjing, 211800, China.

*E-mail: iamxcdong@njtech.edu.cn; iamwlsi@njtech.edu.cn*

<sup>b</sup>Shaanxi Institute of Flexible Electronics (SIFE), Northwestern Polytechnical University (NPU), 127 West Youyi Road, Xi'an 710072, China

<sup>c</sup>School of Pharmaceutical Sciences, Nanjing Tech University (NanjingTech), 30 South Puzhu Road, Nanjing 211800, China.

<sup>d</sup>Department of Hepatobiliary and Pancreatic Surgery, Zhongda Hospital, Medical School, Southeast University, Nanjing 210009, China.

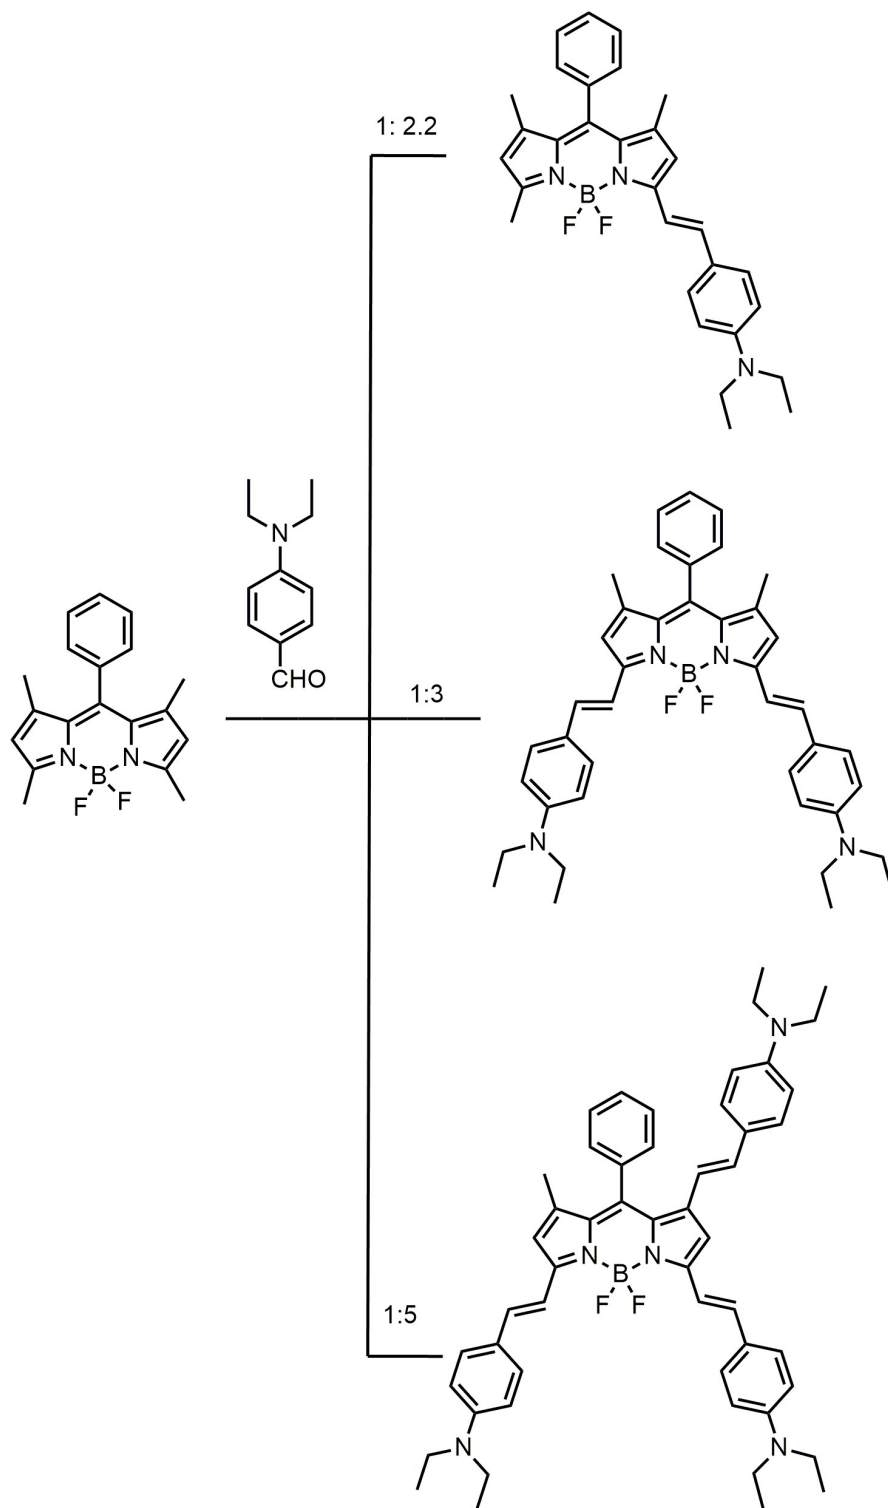

Figure S1. Synthetic route of BDPmPh, BDPbiPh and BDPtriPh

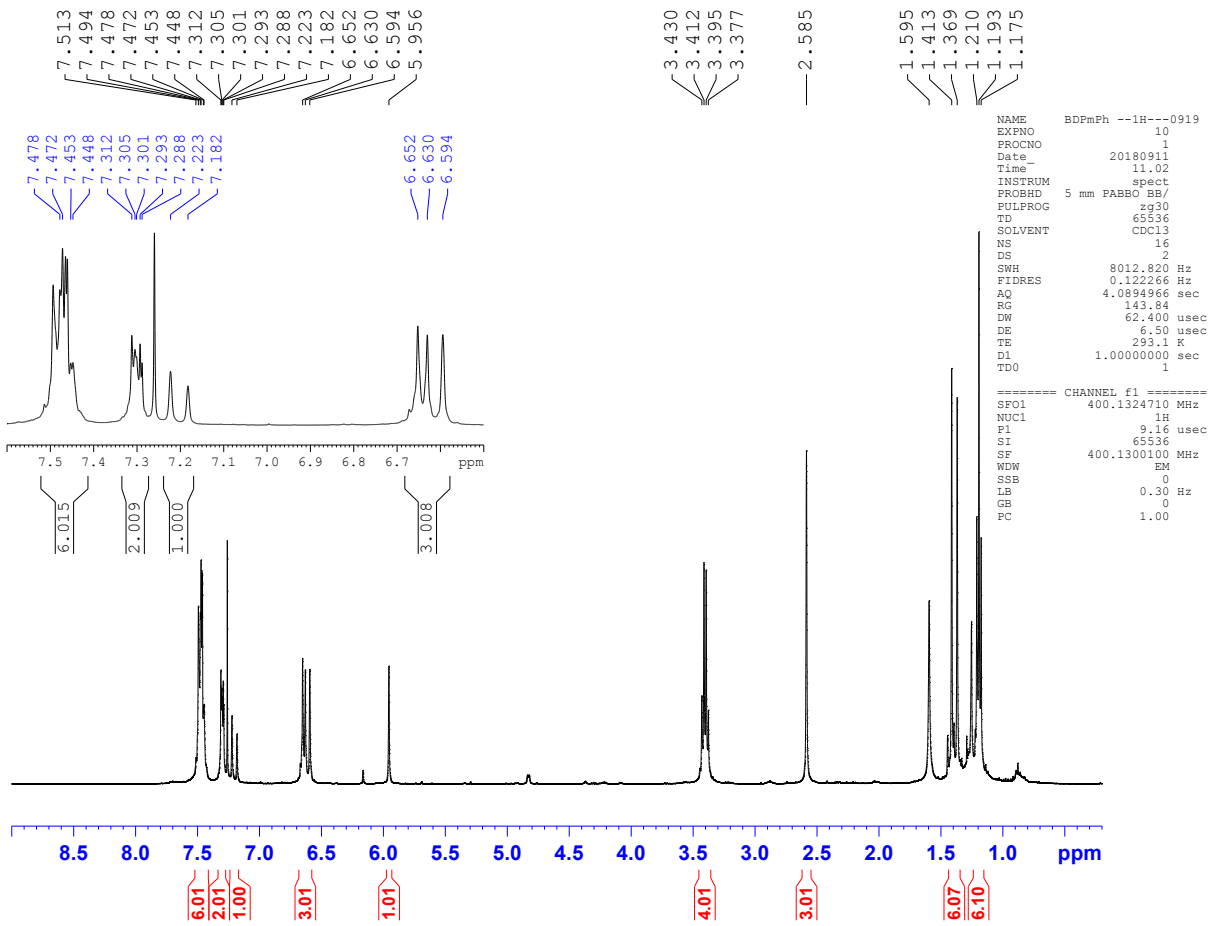

Figure S2. <sup>1</sup>H NMR of BDPmPh in CDCl<sub>3</sub>.

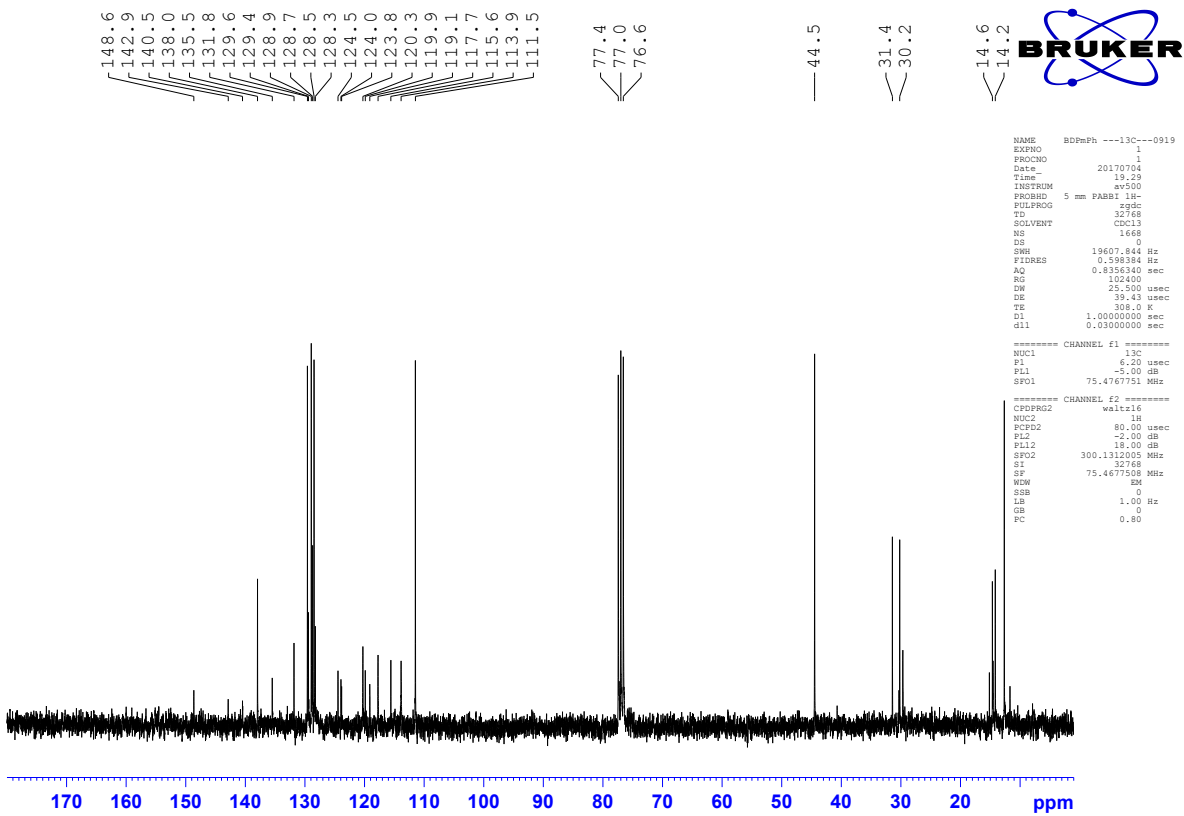

Figure S3.  $^{13}\text{C}$  NMR of BDPmPh in  $\text{CDCl}_3$ .



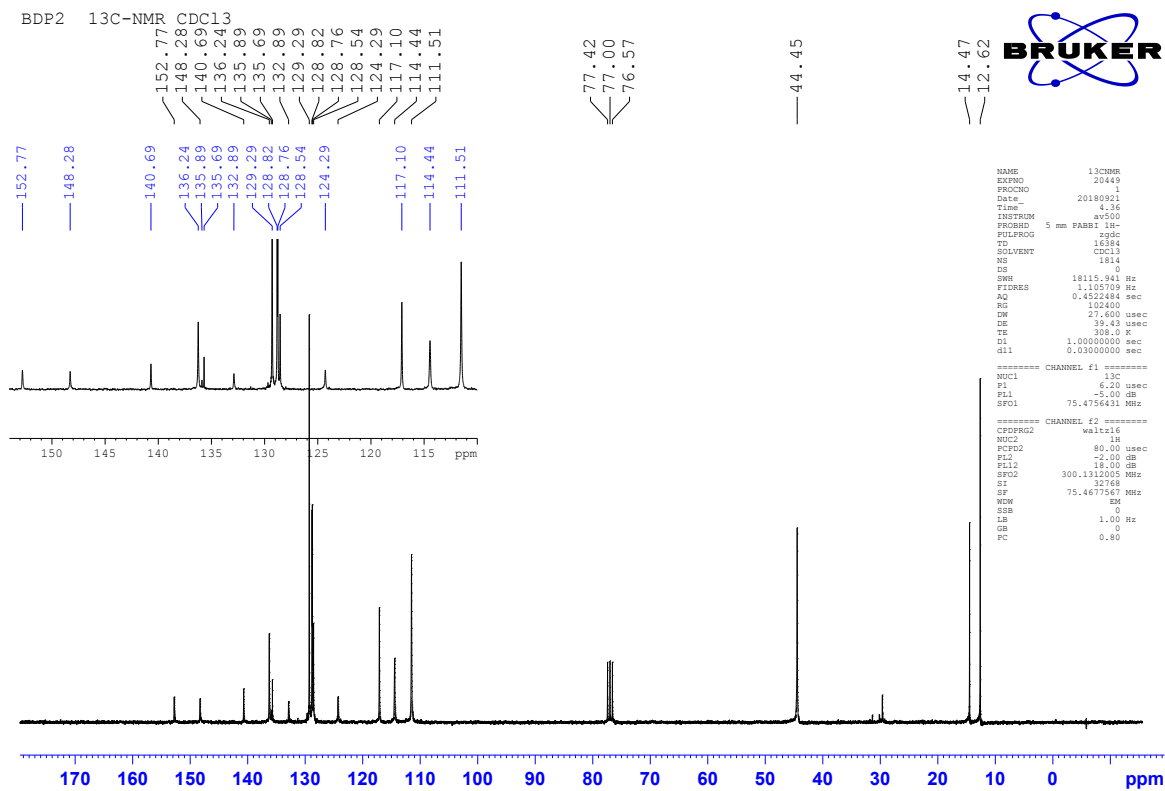

Figure S5. <sup>13</sup>C NMR of BDPbiPh in CDCl<sub>3</sub>.

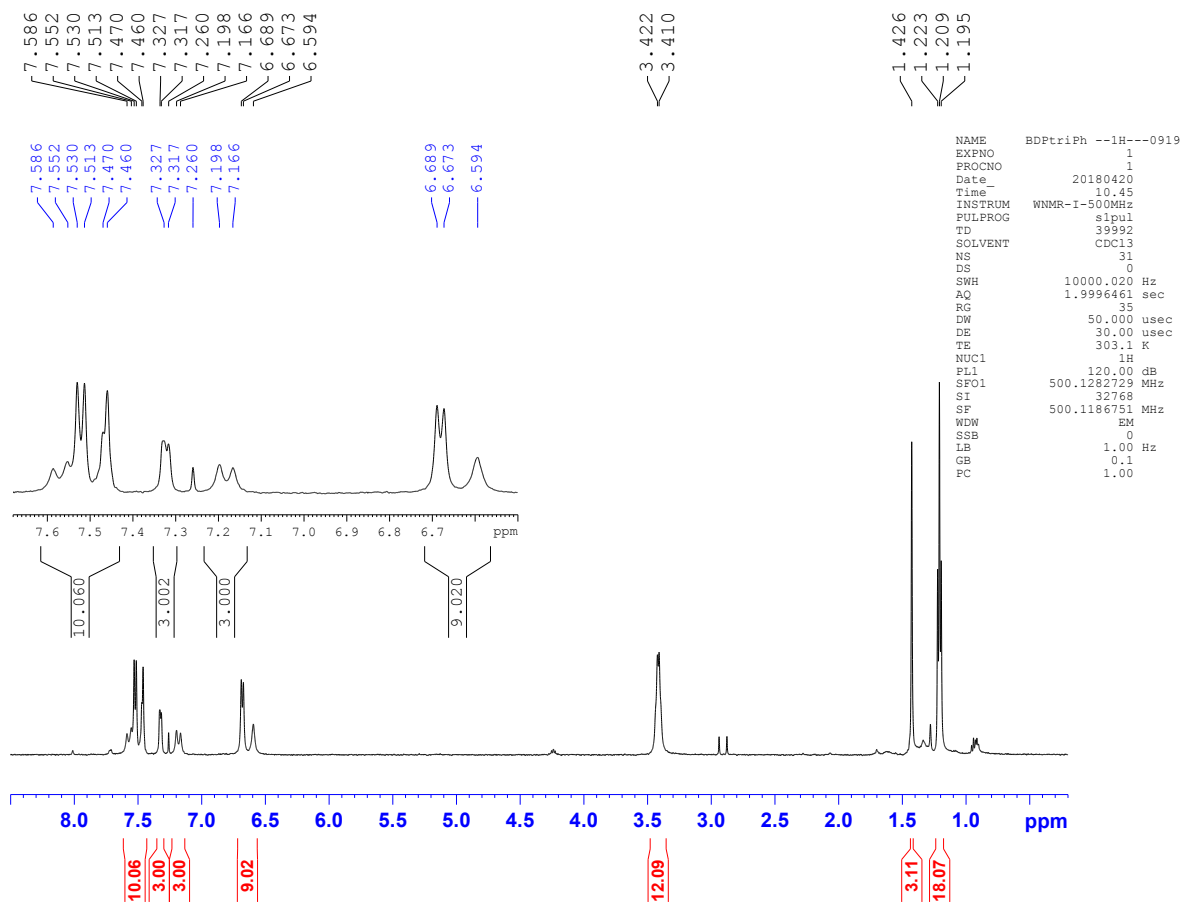

Figure S6.  $^1\text{H}$  NMR of BDPtriPh in  $\text{CDCl}_3$ .

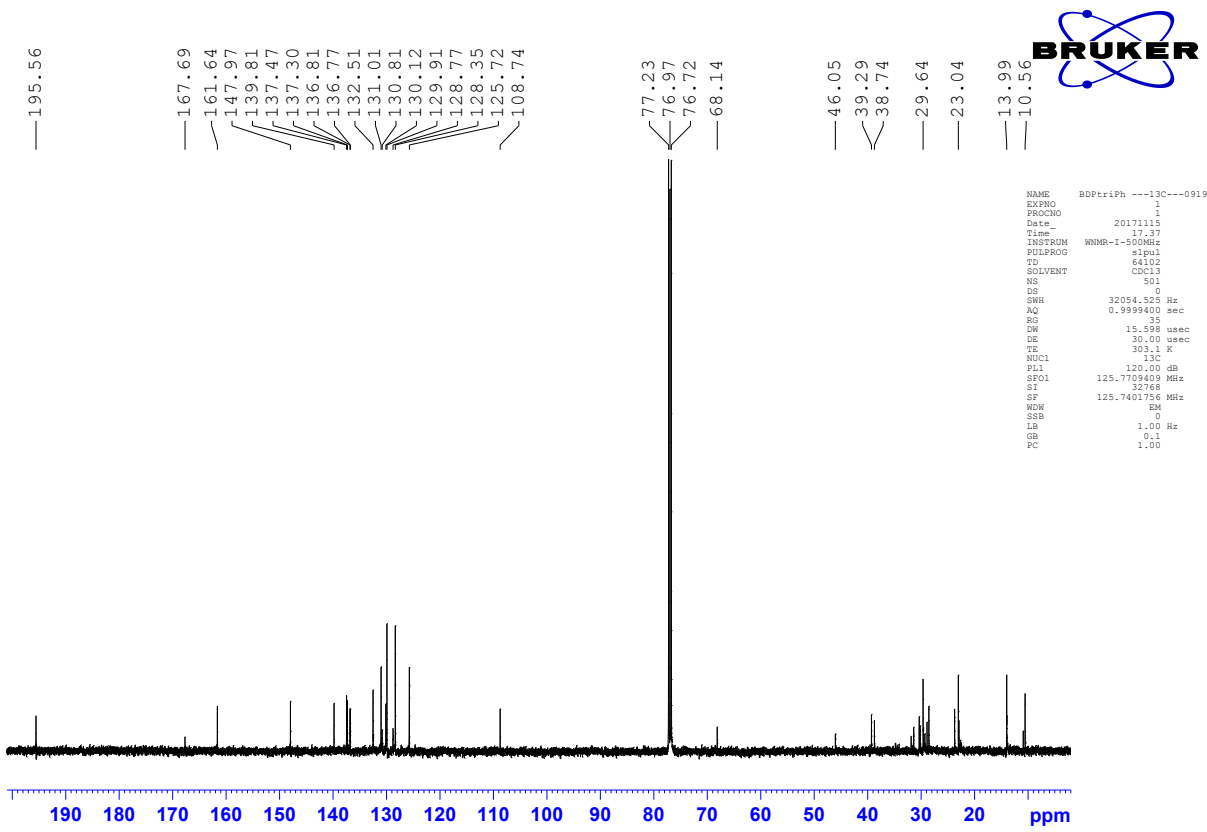

Figure S7. <sup>13</sup>C NMR of BDPtriPh in CDCl<sub>3</sub>.



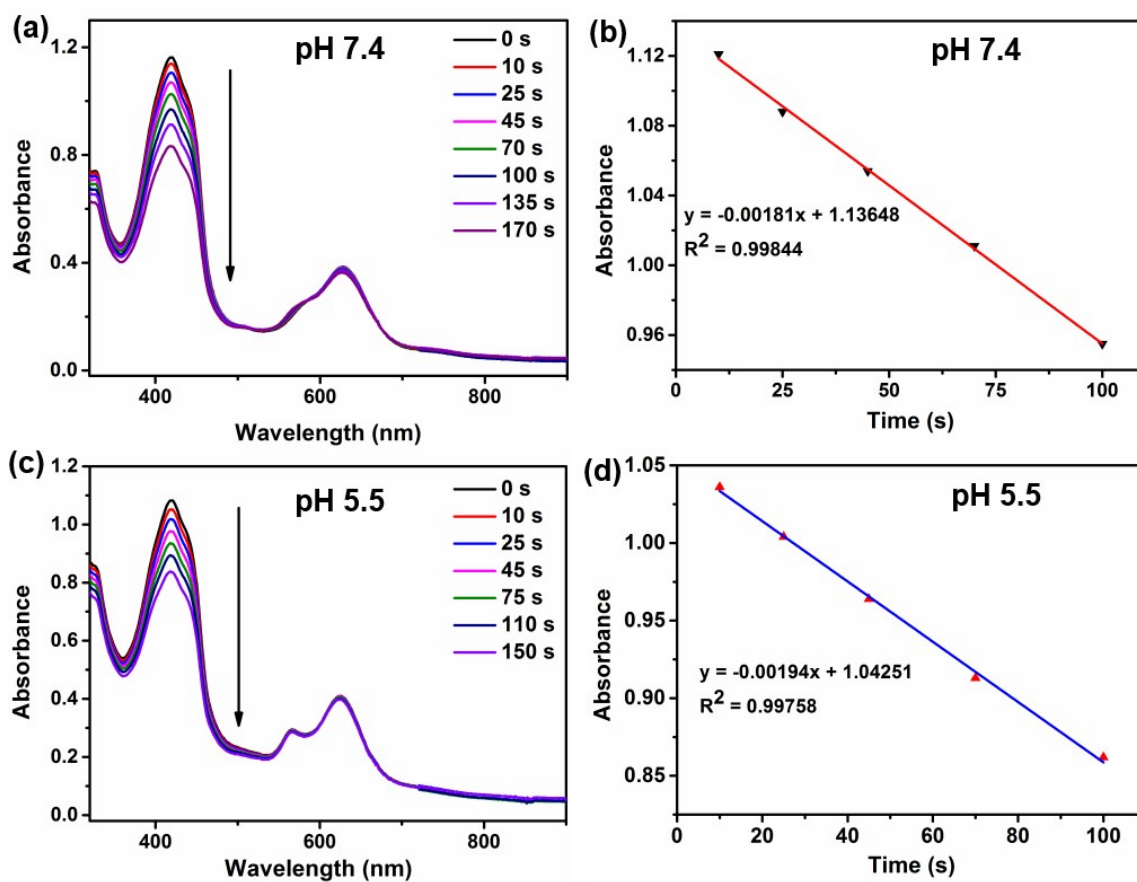

Figure S8. (a, b) Degradation of DPBF in the presence of BDPmPh NPs and linear fitting in PBS. (c, d) Degradation of DPBF in the presence of BDPmPh NPs and linear fitting in PBS.

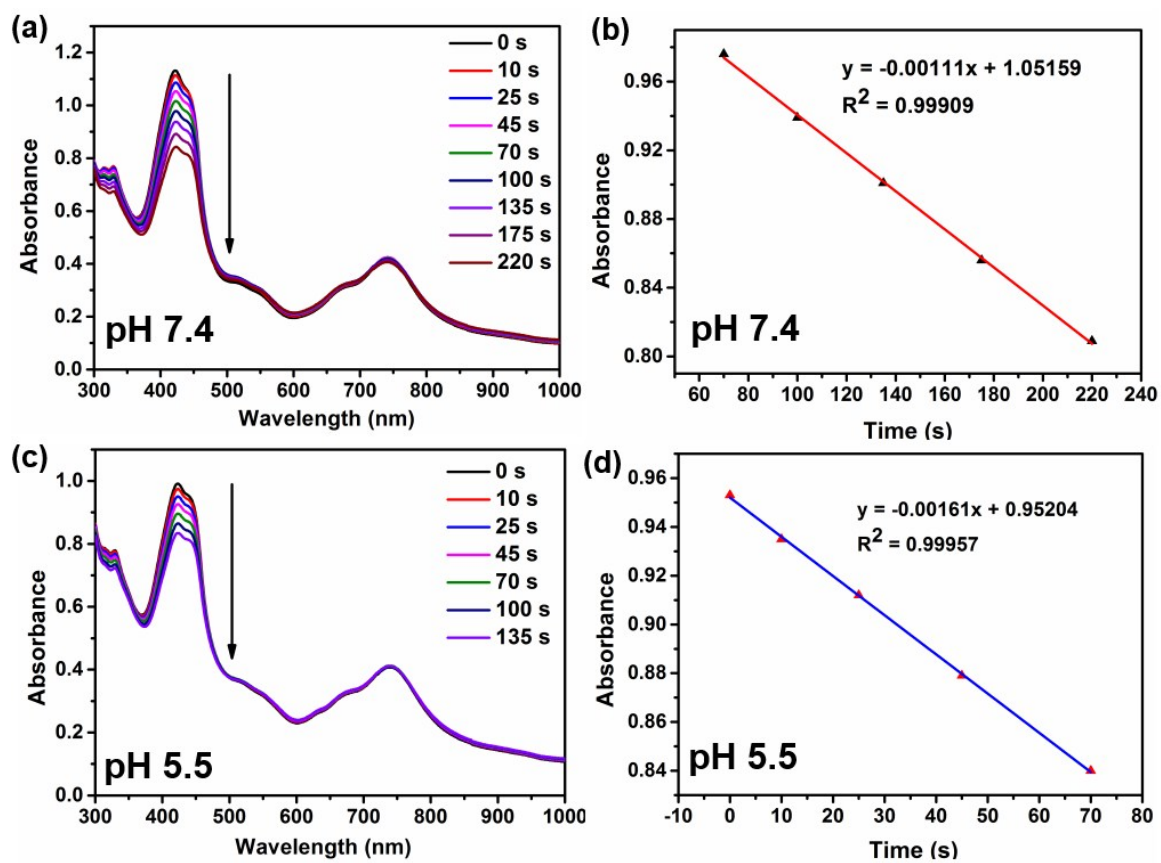

Figure S9. (a, b) Degradation of DPBF in the presence of BDPbiPh NPs and linear fitting in PBS. (c, d) Degradation of DPBF in the presence of BDPbiPh NPs and linear fitting in PBS.

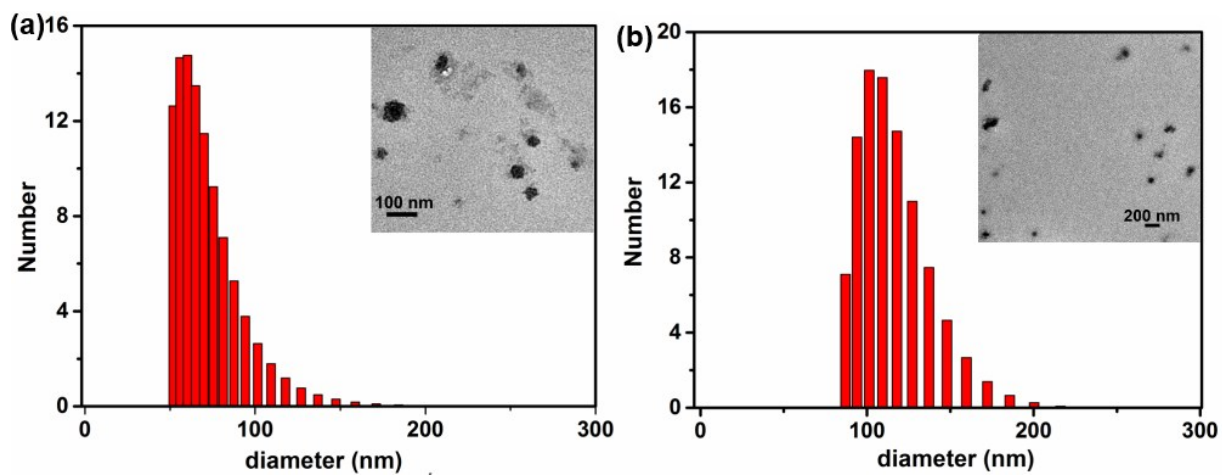

Figure S10. TEM image and DLS of (a) BDPmPh NPs and (b) BDPbiPh NPs.

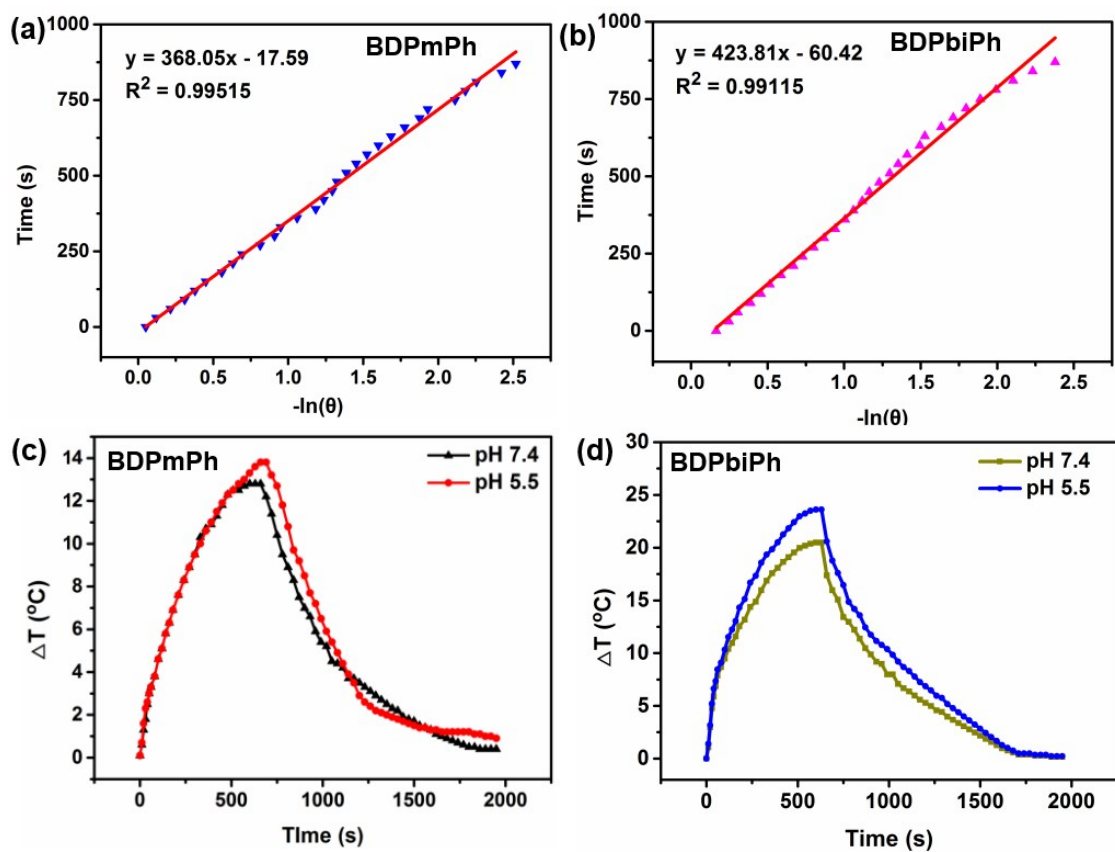

Figure S11. Linear fitting of  $-\ln\theta$  and time of (a) BDPmPh (b) BDPbiPh NPs. Temperature change of (c) BDPmPh NPs with laser irradiation (660 nm, 1 W/cm<sup>2</sup>). (d) BDPbiPh NPs with laser irradiation (730 nm, 1 W/cm<sup>2</sup>) at different pH.

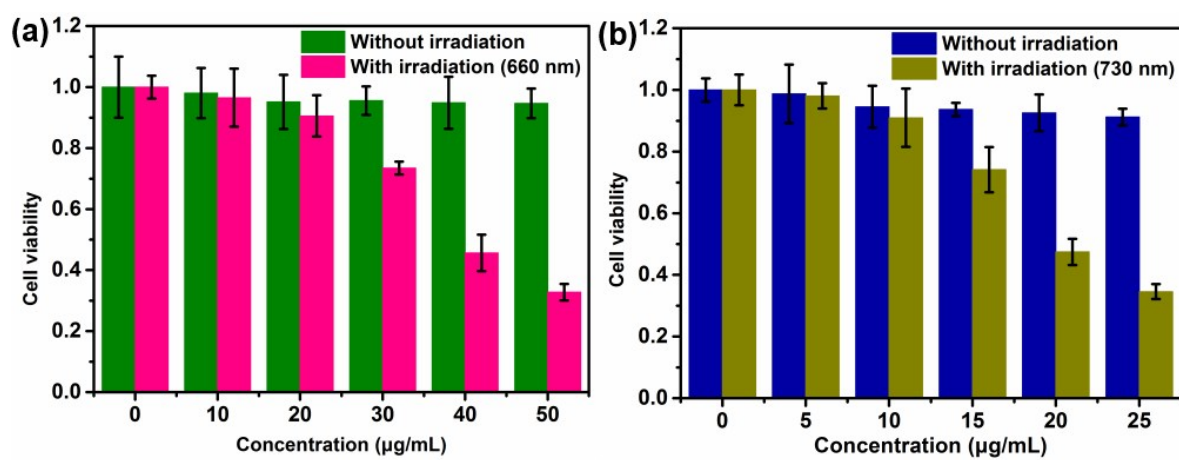

Figure S12. MTT assay of (a) BDPmPh and (b) BDPbiPh NPs with or without irradiation (BDPmPh: 660 nm, 1 W/cm<sup>2</sup>, BDPbiPh: 730 nm, 1 W/cm<sup>2</sup>)
